# Supplementary material
Source: PubMed Central journal article supplement (PMC8320480)
Supplement: jcsm.9132.ds001.pdf [file jcsm.9132.ds001.pdf]

**Table S1.** Sleep disorders diagnostic codes.

| OSA             |                                                                              |
|-----------------|------------------------------------------------------------------------------|
| ICD code*       | Diagnosis                                                                    |
| 780.57          | Unspecified sleep apnea                                                      |
| G47.30          | Sleep apnea, unspecified                                                     |
| 780.53          | Hypersomnia with sleep apnea, unspecified                                    |
| R06.83          | Snoring                                                                      |
| 327.23, G47.33, | Obstructive sleep apnea (adult) (pediatric)                                  |
| Hypoventilation |                                                                              |
| ICD code*       | Diagnosis                                                                    |
| G47.36          | Sleep related hypoventilation in conditions classified elsewhere             |
| 278.03          | Obesity hypoventilation syndrome                                             |
| E66.2           | Morbid (severe) obesity with alveolar hypoventilation                        |
| G47.34, 327.24  | Idiopathic sleep related non-obstructive alveolar hypoventilation            |
| 327.26          | Sleep related hypoventilation/hypoxemia in conditions classifiable elsewhere |
| G47.35, 327.25  | Congenital central alveolar hypoventilation syndrome                         |
| CSA             |                                                                              |
| ICD code*       | Diagnosis                                                                    |
| G47.31, 327.21  | Primary central sleep apnea                                                  |
| R06.3           | Periodic breathing                                                           |
| G47.37, 327.27  | Central sleep apnea in conditions classified elsewhere                       |
| Insomnia        |                                                                              |
| ICD code*       | Diagnosis                                                                    |
| G47.00, 780.52  | Insomnia, unspecified                                                        |
| F51.04          | Psychophysiologic insomnia                                                   |
| G47.01          | Insomnia due to medical condition                                            |
| F51.05          | Insomnia due to other mental disorder                                        |
| F51.01          | Primary insomnia                                                             |
| G47.09          | Other insomnia                                                               |
| 327.01          | Insomnia due to medical condition classified elsewhere                       |
| 327.02          | Insomnia due to mental disorder                                              |
| F51.02          | Adjustment insomnia                                                          |
| 327.00          | Organic insomnia, unspecified                                                |
| F51.09          | Other insomnia not due to a substance or known physiological condition       |
| F51.03          | Paradoxical insomnia                                                         |
| 780.51          | Insomnia with sleep apnea, unspecified                                       |
| 327.09          | Other organic insomnia                                                       |
| G47.0           | Insomnia                                                                     |

|                 |                                                                          |
|-----------------|--------------------------------------------------------------------------|
| 327.0           | Organic disorders of initiating and maintaining sleep [Organic insomnia] |
| <b>RLS/PLMD</b> |                                                                          |
| ICD code*       | Diagnosis                                                                |
| 333.94          | Restless legs syndrome                                                   |
| G47.61, 327.51  | Periodic limb movement disorder                                          |

Obstructive sleep apnea, OSA; Central sleep apnea, CSA; Restless legs syndrome, RLS; Periodic limb movement disorder, PLMD. International Classification of Disease; ICD. \*Both ICD 9 and 10 codes queried.

**Table S2:** Descriptive characteristics of 572 hospitalized patients with COVID-19 patients by sleep disorder status (CSA, Hypoventilation, RLS).

| Characteristic                                            | Overall (n=572)                 | CSA                           |                                 |        | Hypoventilation              |                                 |       | RLS/PLMD                       |                                 |      |
|-----------------------------------------------------------|---------------------------------|-------------------------------|---------------------------------|--------|------------------------------|---------------------------------|-------|--------------------------------|---------------------------------|------|
|                                                           |                                 | Yes(n=4)                      | No (n=568)                      | P      | Yes (n=5)                    | No (n=567)                      | P     | Yes (n=22)                     | No (n=550)                      | P    |
| Age (years), median (IQR)                                 | 63.0 (50.0 to 73.5) (n=572)     | 69.0 (49.0 to 82.0) (n=4)     | 63.0 (50.0 to 73.0) (n=568)     | 0.54   | 56.0 (46.0 to 60.0) (n=5)    | 63.0 (50.0 to 74.0) (n=567)     | 0.33  | 64.5 (56.0 to 71.0) (n=22)     | 63.0 (50.0 to 74.0) (n=550)     | 0.73 |
| Female, n (%)                                             | 252 (44)                        | 1 (25)                        | 251 (44)                        | <0.001 | 4 (80)                       | 248 (44)                        | 0.45  | 11 (50)                        | 241 (44)                        | 0.83 |
| Race, n (%)                                               |                                 |                               |                                 | 0.09   |                              |                                 | 0.03  |                                |                                 | 0.02 |
| Black                                                     | 160 (28)                        | 0 (0)                         | 160 (28)                        |        | 4 (80)                       | 156 (28)                        |       | 2 (9)                          | 158 (29)                        |      |
| Other                                                     | 81 (14)                         | 2 (50)                        | 79 (14)                         |        |                              | 81 (14)                         |       | 1 (5)                          | 80 (15)                         |      |
| White                                                     | 331 (58)                        | 2 (50)                        | 329 (58)                        |        | 1 (20)                       | 330 (58)                        |       | 19 (86)                        | 312 (57)                        |      |
| BMI (kg/m <sup>2</sup> ), median (IQR)                    | 31.0 (25.5 to 37.8) (n=537)     | 27.0 (22.1 to 34.5) (n=3)     | 31.1 (25.5 to 37.9) (n=534)     | 0.39   | 43.7 (41.9 to 44.8) (n=5)    | 30.9 (25.5 to 37.4) (n=532)     | 0.004 | 29.5 (26.8 to 34.0) (n=22)     | 31.1 (25.4 to 37.9) (n=515)     | 0.52 |
| Temperature (°Fahrenheit), median (IQR)                   | 98.8 (98.2 to 99.9) (n=569)     | 99.1 (98.3 to 100.0) (n=4)    | 98.8 (98.2 to 99.9) (n=565)     | 0.85   | 99.0 (98.3 to 102.6) (n=5)   | 98.8 (98.2 to 99.9) (n=564)     | 0.44  | 98.5 (98.1 to 99.0) (n=22)     | 98.8 (98.2 to 99.9) (n=547)     | 0.29 |
| Absolute lymphocyte count (10 <sup>9</sup> /L)            | 0.9 (0.6 to 1.3) (n=551)        | 0.8 (0.6 to 1.2) (n=4)        | 0.9 (0.6 to 1.3) (n=547)        | 0.61   | 1.3 (1.1 to 1.8) (n=5)       | 0.9 (0.6 to 1.3) (n=546)        | 0.07  | 0.7 (0.4 to 0.9) (n=22)        | 0.9 (0.6 to 1.3) (n=529)        | 0.01 |
| Alkaline phosphatase (IU/L), median (IQR)                 | 78.0 (60.0 to 104.0) (n=539)    | 72.5 (69.0 to 94.0) (n=4)     | 78.0 (60.0 to 104.0) (n=535)    | 0.96   | 82.0 (73.0 to 93.0) (n=5)    | 78.0 (60.0 to 104.0) (n=534)    | 0.69  | 90.5 (68.5 to 112.5) (n=20)    | 78.0 (59.0 to 104.0) (n=519)    | 0.15 |
| Alanine aminotransferase (IU/L), median (IQR)             | 32.0 (21.0 to 54.0) (n=542)     | 27.0 (23.0 to 50.0) (n=4)     | 32.0 (21.0 to 54.0) (n=538)     | 0.91   | 20.0 (17.0 to 40.0) (n=5)    | 32.0 (21.0 to 54.0) (n=537)     | 0.34  | 27.0 (19.0 to 37.0) (n=20)     | 32.0 (21.0 to 54.0) (n=522)     | 0.19 |
| Aspartate aminotransferase (IU/L), median                 | 43.5 (30.0 to 66.0) (n=542)     | 35.0 (27.0 to 82.0) (n=4)     | 44.0 (30.0 to 66.0) (n=538)     | 0.74   | 34.0 (32.0 to 43.0) (n=5)    | 44.0 (30.0 to 67.0) (n=537)     | 0.27  | 42.0 (29.0 to 58.5) (n=20)     | 44.0 (30.0 to 67.0) (n=522)     | 0.52 |
| Albumin (g/dL), median (IQR)                              | 3.7 (3.4 to 4.0) (n=539)        | 3.5 (3.2 to 4.0) (n=4)        | 3.7 (3.4 to 4.0) (n=535)        | 0.58   | 3.9 (3.5 to 4.1) (n=5)       | 3.7 (3.4 to 4.0) (n=534)        | 0.51  | 3.8 (3.5 to 4.1) (n=20)        | 3.7 (3.4 to 4.0) (n=519)        | 0.46 |
| eGFR (ml/min/1.73m <sup>2</sup> ), median (IQR)           | 70.0 (45.4 to 90.9) (n=557)     | 52.9 (45.3 to 60.5) (n=2)     | 70.3 (45.4 to 91.1) (n=555)     | 0.38   | 75.5 (8.5 to 81.0) (n=5)     | 70.0 (45.4 to 91.0) (n=552)     | 0.51  | 67.6 (59.5 to 84.3) (n=21)     | 70.1 (45.3 to 91.1) (n=536)     | 0.97 |
| Total bilirubin (mg/dl), median (IQR)                     | 0.6 (0.4 to 0.9) (n=539)        | 0.5 (0.5 to 0.6) (n=4)        | 0.6 (0.4 to 0.9) (n=535)        | 0.54   | 0.3 (0.2 to 0.3) (n=5)       | 0.6 (0.4 to 0.9) (n=534)        | 0.03  | 0.5 (0.4 to 0.8) (n=20)        | 0.6 (0.4 to 0.9) (n=519)        | 0.29 |
| C-reactive protein (mg/L), median (IQR)                   | 7.6 (3.8 to 15.1) (n=438)       | 7.2 (1.6 to 27.2) (n=3)       | 7.6 (3.8 to 15.1) (n=435)       | 0.98   | 2.8 (2.6 to 7.1) (n=3)       | 7.7 (3.8 to 15.2) (n=435)       | 0.18  | 5.9 (2.4 to 8.7) (n=13)        | 7.7 (3.8 to 15.2) (n=425)       | 0.28 |
| D-Dimer (mg/dL), median (IQR)                             | 1.0 (0.6 to 1.9) (n=410)        | 0.9 (0.4 to 1.4) (n=2)        | 1.0 (0.6 to 1.9) (n=408)        | 0.46   | 1.1 (0.5 to 4.1) (n=4)       | 1.0 (0.6 to 1.9) (n=406)        | 0.87  | 0.9 (0.5 to 2.1) (n=15)        | 1.0 (0.6 to 1.9) (n=395)        | 0.43 |
| Ferritin (ng/mL), median (IQR)                            | 611.1 (249.8 to 1350.2) (n=450) | 1285.5 (53.3 to 1849.5) (n=3) | 607.1 (249.8 to 1350.2) (n=447) | 0.77   | 388.9 (160.7 to 617.0) (n=2) | 611.1 (251.9 to 1358.5) (n=448) | 0.41  | 360.2 (133.0 to 1366.7) (n=13) | 615.7 (256.3 to 1320.2) (n=437) | 0.24 |
| Lactate dehydrogenase (IU/L), median (IQR)                | 348.0 (258.0 to 486.0) (n=401)  | 210.0 (92.0 to 274.0) (n=3)   | 351.0 (260.0 to 487.0) (n=398)  | 0.04   | 239.0 (201.0 to 277.0) (n=2) | 349.0 (258.0 to 487.0) (n=399)  | 0.16  | 306.5 (236.0 to 432.0) (n=10)  | 349.0 (258.0 to 490.0) (n=391)  | 0.45 |
| White blood cell count (10 <sup>9</sup> /L), median (IQR) | 7.0 (5.1 to 9.9) (n=569)        | 5.4 (4.7 to 6.6) (n=4)        | 7.0 (5.1 to 10.0) (n=565)       | 0.20   | 9.5 (6.7 to 9.6) (n=5)       | 7.0 (5.1 to 10.0) (n=564)       | 0.51  | 7.5 (4.7 to 13.1) (n=22)       | 7.0 (5.1 to 9.8) (n=547)        | 0.79 |

|                                  |          |         |          |       |        |          |        |         |          |      |
|----------------------------------|----------|---------|----------|-------|--------|----------|--------|---------|----------|------|
| Chronic pulmonary disease, n (%) | 88 (15)  | 0 (0)   | 88 (15)  | 0.39  | 2 (40) | 86 (15)  | 0.13   | 6 (27)  | 82 (15)  | 0.12 |
| Chronic cardiac disease, n (%)   | 163 (28) | 4 (100) | 159 (28) | 0.001 | 2 (40) | 161 (28) | 0.57   | 9 (41)  | 154 (28) | 0.19 |
| Chronic kidney disease, n (%)    | 140 (24) | 2 (50)  | 138 (24) | 0.23  | 2 (40) | 138 (24) | 0.42   | 7 (32)  | 133 (24) | 0.41 |
| Asthma, n (%)                    | 88 (15)  | 1 (25)  | 87 (15)  | 0.59  | 4 (80) | 84 (15)  | <0.001 | 5 (23)  | 83 (15)  | 0.33 |
| Hypertension, n (%)              | 357 (62) | 4 (100) | 353 (62) | 0.12  | 4 (80) | 353 (62) | 0.41   | 15 (68) | 342 (62) | 0.57 |
| Diabetes, n (%)                  | 204 (36) | 3 (75)  | 201 (35) | 0.10  | 4 (80) | 200 (35) | 0.04   | 6 (27)  | 198 (36) | 0.40 |

Central sleep apnea, CSA; Restless legs syndrome, RLS; Periodic limb movement disorder; PLMD.

**Table S3.** Comparison of descriptive characteristics of non-transfers vs. transfers.

| Characteristic                                  | Non-transfers (n=572)           | Transfers (n=321)                | P      |
|-------------------------------------------------|---------------------------------|----------------------------------|--------|
| Age (years), median (IQR)                       | 63.0 (50.0 to 73.5) (n=572)     | 56.0 (43.0 to 66.0) (n=321)      | <0.001 |
| Female, n (%)                                   | 252 (44)                        | 131 (41)                         | 0.76   |
| Race, n (%)                                     |                                 |                                  | <0.001 |
| Black                                           | 160 (28)                        | 125 (39)                         |        |
| Other                                           | 81 (14)                         | 68 (21)                          |        |
| White                                           | 331 (58)                        | 128 (40)                         |        |
| BMI (kg/m <sup>2</sup> ), median (IQR)          | 31.0 (25.5 to 37.8) (n=537)     | 31.5 (26.8 to 38.9) (n=309)      | 0.04   |
| Temperature (°Fahrenheit), median (IQR)         | 98.8 (98.2 to 99.9) (n=569)     | 98.6 (98.1 to 99.3) (n=317)      | 0.02   |
| Absolute lymphocyte count (10 <sup>9</sup> /L)  | 0.9 (0.6 to 1.3) (n=551)        | 0.8 (0.6 to 1.2) (n=272)         | 0.06   |
| Alkaline phosphatase (IU/L), median (IQR)       | 78.0 (60.0 to 104.0) (n=539)    | 74.0 (57.0 to 107.5) (n=296)     | 0.69   |
| Alanine aminotransferase (IU/L), median         | 32.0 (21.0 to 54.0) (n=542)     | 38.0 (24.5 to 69.0) (n=296)      | <0.001 |
| Aspartate aminotransferase (IU/L), median       | 43.5 (30.0 to 66.0) (n=542)     | 51.5 (33.5 to 86.5) (n=296)      | <0.001 |
| Albumin (g/dL), median (IQR)                    | 3.7 (3.4 to 4.0) (n=539)        | 3.4 (3.0 to 3.8) (n=298)         | <0.001 |
| eGFR (ml/min/1.73m <sup>2</sup> ), median (IQR) | 70.0 (45.4 to 90.9) (n=557)     | 64.0 (29.4 to 91.0) (n=313)      | 0.04   |
| Total bilirubin (mg/dl), median (IQR)           | 0.6 (0.4 to 0.9) (n=539)        | 0.6 (0.4 to 0.8) (n=296)         | 0.70   |
| C-reactive protein (mg/L), median (IQR)         | 7.6 (3.8 to 15.1) (n=438)       | 12.8 (5.1 to 23.3) (n=261)       | <0.001 |
| D-Dimer (mg/dL ), median (IQR)                  | 1.0 (0.6 to 1.9) (n=410)        | 2.1 (1.0 to 6.4) (n=250)         | <0.001 |
| Ferritin (ng/mL), median (IQR)                  | 611.1 (249.8 to 1350.2) (n=450) | 1007.1 (413.9 to 1593.9) (n=258) | <0.001 |
| Lactate dehydrogenase (IU/L), median (IQR)      | 348.0 (258.0 to 486.0) (n=401)  | 494.0 (323.0 to 635.0) (n=239)   | <0.001 |
| White blood cell count (10 <sup>9</sup> /L), m  | 7.0 (5.1 to 9.9) (n=569)        | 10.1 (6.6 to 14.9) (n=318)       | <0.001 |
| Chronic pulmonary disease, n (%)                | 88 (15)                         | 46 (14)                          | 0.67   |
| Chronic cardiac disease, n (%)                  | 163 (28)                        | 66 (21)                          | 0.01   |
| Chronic kidney disease, n (%)                   | 140 (24)                        | 67 (21)                          | 0.22   |
| Asthma, n (%)                                   | 88 (15)                         | 73 (23)                          | 0.01   |
| Hypertension, n (%)                             | 357 (62)                        | 184 (57)                         | 0.14   |
| Diabetes, n (%)                                 | 204 (36)                        | 117 (36)                         | 0.81   |
| OSA                                             | 113 (20)                        | 47 (15)                          | 0.06   |
| CSA                                             | 4 (1)                           | 4 (1)                            | 0.41   |
| Hypovent                                        | 5 (1)                           | 1 (1)                            | 0.32   |
| Insomnia                                        | 63 (11)                         | 26 (8)                           | 0.16   |
| RLS                                             | 22 (4)                          | 6 (2)                            | 0.10   |
| Vent, n (%)                                     | 109 (19)                        | 173 (54)                         | <0.001 |
| Death, n (%)                                    | 72 (13)                         | 68 (21)                          | 0.001  |
| Vasopressors treatment, n (%)                   | 102 (18)                        | 158 (49)                         | <0.001 |
| Length of Stay (days), median (IQR)             | 8.0 (3.0 to 30.0) (n=566)       | 24.0 (8.0 to 76.0) (n=317)       | <0.001 |

**Table S4.** Sleep disorders among 893 (transfers and non-transfers) COVID-19 hospitalized patients: prevalence and unadjusted association with mechanical ventilation, vasopressor requirement, death and length of stay.

| Sleep diagnosis | All [N=893] N(%) | Mechanical ventilation [N=282] N(%) | OR [95% CI]       | Vasopressor requirement [N=260] N(%) | OR [95% CI]       | Death [N=140] N(%) | OR [95% CI]       | LOS [N=893] median (IQR) | HR to discharge [95% CI] |
|-----------------|------------------|-------------------------------------|-------------------|--------------------------------------|-------------------|--------------------|-------------------|--------------------------|--------------------------|
| <b>OSA</b>      | 160 (17.9%)      | 42 (14.9%)                          | 0.73[0.50, 1.07]  | 39 (15.0%)                           | 0.75 [0.50, 1.11] | 21 (15.0%)         | 0.78 [0.47, 1.28] | 10 (3, 43)               | 1.08 [0.90, 1.30]        |
| <b>Insomnia</b> | 89 (10.0%)       | 21 (7.5%)                           | 0.64 [0.39, 1.07] | 23 (8.9)                             | 0.84 [0.51, 1.37] | 15 (10.7%)         | 1.10 [0.61, 1.98] | 12 (4, 68)               | 0.98 [0.77, 1.25]        |
| <b>RLS/PLMD</b> | 28 (3.1%)        | 2 (0.7%)                            | 0.16 [0.04, 0.68] | 3 (1.1)                              | 0.28 [0.09, 0.95] | 4 (2.9%)           | 0.9 [0.31, 2.62]  | 9.5 (4.5, 40)            | 1.08 [0.72, 1.62]        |

Length of stay (LOS); Obstructive sleep apnea, OSA; Central sleep apnea, CSA; Restless legs syndrome, RLS; Periodic limb movement disorder, PLMD.

**Table S5.** Multivariable logistic and Cox-proportional hazards regression.

| Characteristic                   | Mechanical ventilation OR [95% CI] | Vasopressor requirement OR [95% CI] | Death OR [95% CI] | HR to discharge [95% CI] |
|----------------------------------|------------------------------------|-------------------------------------|-------------------|--------------------------|
| <b>OSA</b>                       | 0.75 [0.48, 1.18]                  | 0.75 [0.48, 1.19]                   | 0.97 [0.54, 1.72] | 1.02 [0.83, 1.25]        |
| <b>Age*</b>                      | 1.04 [0.94, 1.15]                  | 1.06 [0.96, 1.17]                   | 1.82 [1.57, 2.13] | 0.87 [0.84, 0.91]        |
| <b>Sex</b>                       | 1.57 [1.13, 2.17]                  | 1.65 [1.19, 2.30]                   | 1.29 [0.85, 1.94] | 0.85 [0.73, 0.99]        |
| <b>Race (black vs. white)</b>    | 0.97 [0.76, 1.22]                  | 0.97 [0.77, 1.24]                   | 0.78 [0.57, 1.05] | 1.00 [0.84, 1.18]        |
| <b>Race (other vs. white)</b>    | 1.32 [0.99, 1.76]                  | 1.24 [0.93, 1.66]                   | 1.44 [1.02, 2.04] | 0.82 [0.65, 1.04]        |
| <b>BMI**</b>                     | 1.06 [0.97, 1.15]                  | 1.07 [0.98, 1.17]                   | 0.94 [0.83, 1.07] | 1.03 [0.99, 1.08]        |
| <b>Transfer vs. non-transfer</b> | 4.64 [3.35, 6.42]                  | 4.29 [3.08, 5.96]                   | 2.86 [1.86, 4.39] | 30.59 [19.94, 41.25]     |
| <b>Insomnia</b>                  | 0.86 [0.49, 1.52]                  | 1.12 [0.65, 1.94]                   | 1.00 [0.52, 1.92] | 1.01 [0.78, 1.31]        |
| <b>Age*</b>                      | 1.04 [0.95, 1.15]                  | 1.06 [0.96, 1.17]                   | 1.82 [1.57, 2.13] | 0.87 [0.84, 0.91]        |
| <b>Sex</b>                       | 1.56 [1.13, 2.17]                  | 1.67 [1.20, 2.33]                   | 1.29 [0.85, 1.94] | 0.85 [0.73, 0.99]        |
| <b>Race (black vs. white)</b>    | 0.97 [0.77, 1.23]                  | 0.98 [0.77, 1.24]                   | 0.78 [0.57, 1.05] | 0.99 [0.84, 1.18]        |
| <b>Race (other vs. white)</b>    | 1.33 [0.99, 1.77]                  | 1.27 [0.95, 1.70]                   | 1.44 [1.02, 2.05] | 0.82 [0.65, 1.04]        |
| <b>BMI**</b>                     | 1.04 [0.96, 1.13]                  | 1.06 [0.97, 1.15]                   | 0.94 [0.83, 1.06] | 1.03 [0.99, 1.08]        |
| <b>Transfer vs. non-transfer</b> | 4.69 [3.39, 6.49]                  | 4.33 [3.12, 6.02]                   | 2.86 [1.86, 4.40] | 30.54 [19.92, 41.17]     |
| <b>RLS/PLMD</b>                  | 0.25 [0.06, 1.09]                  | 0.43 [0.12, 1.53]                   | 1.30 [0.41, 4.06] | 0.96 [0.63, 1.49]        |
| <b>Age*</b>                      | 1.04 [0.94, 1.14]                  | 1.06 [0.96, 1.17]                   | 1.83 [1.57, 2.13] | 0.87 [0.84, 0.91]        |
| <b>Sex</b>                       | 1.55 [1.12, 2.15]                  | 1.65 [1.19, 2.29]                   | 1.29 [0.86, 1.94] | 0.85 [0.73, 0.99]        |
| <b>Race (black vs. white)</b>    | 0.96 [0.76, 1.21]                  | 0.97 [0.76, 1.23]                   | 0.78 [0.57, 1.06] | 0.99 [0.84, 1.17]        |
| <b>Race (other vs. white)</b>    | 1.31 [0.99, 1.75]                  | 1.25 [0.93, 1.66]                   | 1.45 [1.02, 2.05] | 0.82 [0.65, 1.03]        |
| <b>BMI**</b>                     | 1.04 [0.96, 1.13]                  | 1.06 [0.97, 1.15]                   | 0.94 [0.83, 1.06] | 1.03 [0.99, 1.08]        |
| <b>Transfer vs. non-transfer</b> | 4.65 [3.36, 6.44]                  | 4.30 [3.09, 5.97]                   | 2.88 [1.87, 4.43] | 30.58 [19.95, 41.22]     |

Obstructive sleep apnea, OSA; Restless legs syndrome, RLS; Periodic limb movement disorder, PLMD; Body mass index, BMI. \*Age per 10 years. \*\*BMI in 5 kg/m<sup>2</sup> increments.

**Table S6.** HST or PSG parameters in 100 patients with available diagnostic sleep study data.

| Sleep parameter                              | Mechanical ventilation |                     | p-value | Vasopressor requirement |                     | p-value     | Death               |                     | p-value |
|----------------------------------------------|------------------------|---------------------|---------|-------------------------|---------------------|-------------|---------------------|---------------------|---------|
|                                              | yes                    | no                  |         | yes                     | no                  |             | yes                 | no                  |         |
| <b>AHI (REI)*</b>                            |                        |                     | 0.24    |                         |                     | 0.20        |                     |                     | 0.40    |
| N (missing)                                  | 21 (0)                 | 74 (5)              |         | 19 (0)                  | 76 (5)              |             | 13(0)               | 82(5)               |         |
| Median (IQR)                                 | 18.3 (3.7 to 49.8)     | 8.9 (3.6 to 28.9)   |         | 18.3 (3.2 to 70.3)      | 8.9 (3.6 to 29.0)   |             | 15.2 (5.9 to 39.1)  | 9.0 (3.2 to 33.8)   |         |
| Range                                        | 1.5 to 103.0           | 0.0 to 142.0        |         | 1.5 to 142.0            | 0.0 to 116.7        |             | 1.9 to 68.9         | 0.0 to 142.0        |         |
| <b>Mean SpO<sub>2</sub>%</b>                 |                        |                     | 0.49    |                         |                     | 0.34        |                     |                     | 0.53    |
| N (missing)                                  | 21 (0)                 | 79 (0)              |         | 19 (0)                  | 81 (0)              |             | 13(0)               | 87 (0)              |         |
| Median (IQR)                                 | 93.0 (91.6 to 94.0)    | 93.7 (91.0 to 95.0) |         | 93.0 (90.0 to 94.0)     | 93.7 (91.8 to 95.0) |             | 93.0 (91.9 to 94.0) | 94.0 (91.0 to 95.0) |         |
| Range                                        | 83.0 to 96.0           | 62.0 to 97.1        |         | 83.0 to 96.0            | 62.0 to 97.1        |             | 88.0 to 96.0        | 62.0 to 97.1        |         |
| <b>Minimum SpO<sub>2</sub>%</b>              |                        |                     | 0.20    |                         |                     | <b>0.21</b> |                     |                     | 0.87    |
| N (missing)                                  | 21 (0)                 | 79 (0)              |         | 19 (0)                  | 81 (0)              |             | 13(0)               | 87 (0)              |         |
| Median (IQR)                                 | 83.7 (72.0 to 86.0)    | 83.9 (78.0 to 88.0) |         | 83.7 (72.0 to 86.0)     | 83.9 (78.0 to 88.0) |             | 83.0 (81.0 to 85.0) | 84.0 (76.0 to 88.0) |         |
| Range                                        | 59.0 to 90.0           | 0.0 to 92.9         |         | 63.0 to 89.0            | 0.0 to 92.9         |             | 71.0 to 90.0        | 0.0 to 92.9         |         |
| <b>Time SpO<sub>2</sub>&lt;88% (minutes)</b> |                        |                     | 0.91    |                         |                     | 0.62        |                     |                     | 0.63    |
| N (missing)                                  | 18 (3)                 | 69 (10)             |         | 16 (3)                  | 71 (10)             |             | 11(2)               | 76(11)              |         |
| Median (IQR)                                 | 1.2 (0.1 to 12.7)      | 1.0 (0.0 to 8.4)    |         | 1.2 (0.1 to 15.7)       | 1.0 (0.0 to 8.4)    |             | 1.9 (0.1 to 6.9)    | 1.0 (0.0 to 11.9)   |         |
| Range                                        | 0.0 to 80.1            | 0.0 to 66.3         |         | 0.0 to 80.1             | 0.0 to 66.3         |             | 0.0 to 49.1         | 0.0 to 80.1         |         |
| <b>PLM Index**</b>                           |                        |                     | 0.83    |                         |                     | 0.80        |                     |                     | 0.21    |
| N (missing)                                  | 20(1)                  | 72 (7)              |         | 18 (1)                  | 74 (7)              |             | 13(0)               | 79(8)               |         |
| Median (IQR)                                 | 0.0 (0.0 to 10.4)      | 0.1 (0.0 to 9.0)    |         | 0.9 (0.0 to 10.6)       | 0.0 (0.0 to 8.3)    |             | 3.3 (0.0 to 14.9)   | 0.0 (0.0 to 7.6)    |         |
| Range                                        | 0.0 to 71.0            | 0.0 to 129.9        |         | 0.0 to 71.0             | 0.0 to 129.9        |             | 0.0 to 129.9        | 0.0 to 71.0         |         |

Apnea hypopnea index, AHI; Respiratory event index; REI; Periodic limb movement, PLM; Oxygen saturation, SpO<sub>2</sub>. \*Both AHI and REI were derived with use of 4% hypopnea scoring criteria to harmonize between data extracted from home sleep apnea tests (HST) and in lab polysomnogram (PSG). \*\*Missing in subjects with HST.



**Figure S1.** Respiratory parameters from polysomnogram and home sleep apnea test in the 100 individuals with diagnostic sleep study data.

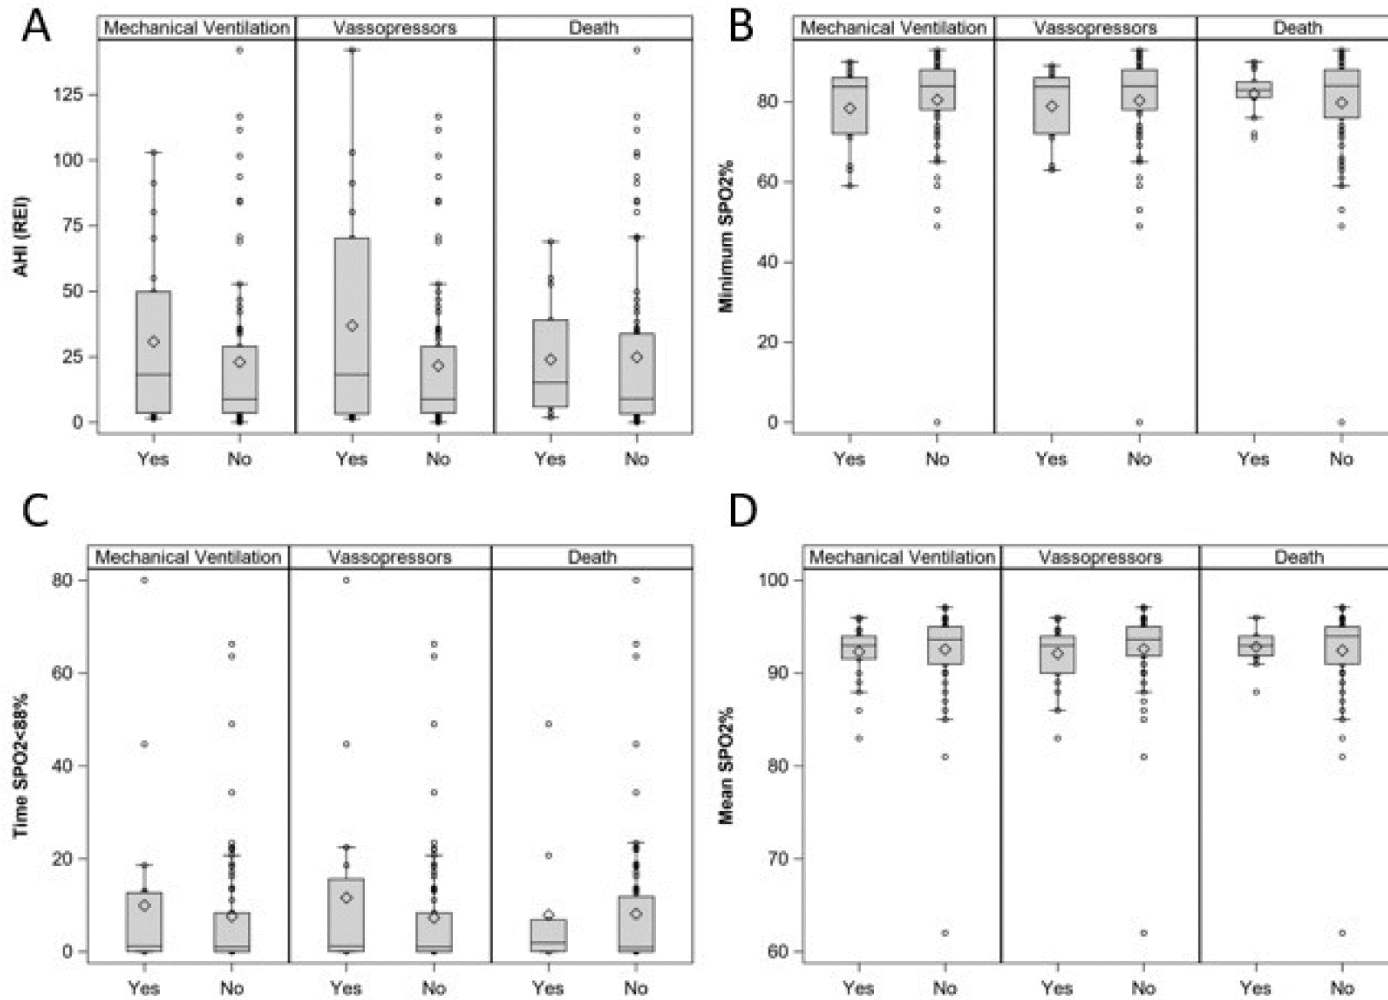

Panel A-AHI (REI) Apnea hypopnea index, AHI; Respiratory event index; REI; Both AHI and REI were derived with use of 4% hypopnea scoring criteria to harmonize between data extracted from home sleep apnea tests (HST) and in lab polysomnogram (PSG). Panel B-Minimum oxygen saturation, SpO<sub>2</sub> (%); Panel C- Time with oxygen saturation, SpO<sub>2</sub>, <88% (minutes); Panel D- Mean oxygen saturation, SpO<sub>2</sub> (%).
